# Supplementary material
Source: PubMed Central journal article supplement (PMC10188411)
Supplement: 10620_2023_7862_MOESM1_ESM.pdf [file 10620_2023_7862_MOESM1_ESM.pdf]

## **SUPPLEMENTARY MATERIALS**

### **SUPPLEMENTARY METHODS**

The Cochrane risk of bias tool uses the following five specific domains to assess the quality of randomised controlled trials (RCTs): selection bias, performance bias, detection bias, attrition bias and reporting bias.

The Quality of Cohort studies (Q-Coh) tool assesses the risk of bias within non-randomised studies using eight domains: design of the study, representativeness, comparability of the groups, exposure measure, maintenance of the comparability, outcome measure, attrition and statistical analyses.

The National Institute of Health (NIH) assessment tool is recommended for studies without a control group.

**Supplementary Table 1.** Search terms, strings and strategy for the systematic literature review in (A) PubMed, (B) Embase, (C) Cochrane CENTRAL database and (D) WHO ICTRP database.

(A) Date of search: 31 March 2020

|                         | Search # | Query                                                                                                                                                                                                                                                                                                                                                                                                                                                                                                                                                                                                                                                                                                                                                                                                                                                                                                                         | Number of citations |
|-------------------------|----------|-------------------------------------------------------------------------------------------------------------------------------------------------------------------------------------------------------------------------------------------------------------------------------------------------------------------------------------------------------------------------------------------------------------------------------------------------------------------------------------------------------------------------------------------------------------------------------------------------------------------------------------------------------------------------------------------------------------------------------------------------------------------------------------------------------------------------------------------------------------------------------------------------------------------------------|---------------------|
| Disease                 | #1       | ("Pruritus"[Mesh]) AND (("Liver Cirrhosis, Biliary"[Mesh]) OR ("Cholestasis"[Mesh]))                                                                                                                                                                                                                                                                                                                                                                                                                                                                                                                                                                                                                                                                                                                                                                                                                                          | 864                 |
|                         | #2       | ("cholestatic pruritus") OR ("pruritus" OR "pruritus" OR itch*) AND (PBC OR "primary biliary cirrhosis" OR "primary biliary cholangitis" OR "cholestatic liver disease" OR "biliary liver cirrhosis" OR cholestasis OR PSC OR "primary sclerosing cholangitis")                                                                                                                                                                                                                                                                                                                                                                                                                                                                                                                                                                                                                                                               | 2112                |
|                         | #3       | #1 OR #2                                                                                                                                                                                                                                                                                                                                                                                                                                                                                                                                                                                                                                                                                                                                                                                                                                                                                                                      | 2112                |
|                         | #4       | #3 NOT pregnancy                                                                                                                                                                                                                                                                                                                                                                                                                                                                                                                                                                                                                                                                                                                                                                                                                                                                                                              | 1604                |
| Intervention            | #5       | drug OR treatment OR therapy OR cholestyramine OR Colestyramine OR colesevalam OR colestipol OR colestimide OR colestilan OR rifampicin OR rifampicin OR naltrexone OR nalmeferone OR nalmetrene OR Nalfurafine OR Buprenorphine OR Naloxone OR sertraline OR gabapentin OR Phenobarbital OR phenobarbitone OR phenobarb OR Flumecinol OR Ondansetron OR Cimetidine OR Cetirizine OR Cyproheptadine OR Desloratadine OR Diphenhydramine OR Fexofenadine OR Hydroxyzine OR Loratadine OR Propofol OR Lidocaine OR Maralixibat OR Odevixibat OR Elobixibat OR Volixibat OR linerixibat OR Fenofibrate OR Bezafibrate OR "LPA inhibitors" OR "ATX inhibitors" OR Fibrates OR antibiotic OR "opiate antagonist" OR "serotonin reuptake inhibitor" OR barbituate OR "benzhydrol derivative" OR "5-HT3 antagonist" OR "H2 antagonist" OR anesthetic OR "bile acid sequestrant" OR anti-histamine OR antiepileptic OR anti-epileptic | 13,324,940          |
| Filters and Combination | #6       | #4 AND #5                                                                                                                                                                                                                                                                                                                                                                                                                                                                                                                                                                                                                                                                                                                                                                                                                                                                                                                     | 1297                |
|                         | #7       | #6 NOT (case reports[ptyp] OR letter[ptyp] OR comment[ptyp] OR editorial[ptyp] OR review[ptyp])                                                                                                                                                                                                                                                                                                                                                                                                                                                                                                                                                                                                                                                                                                                                                                                                                               | 577                 |

ATX, autotaxin; LPA, lysophosphatidic acid; PBC, primary biliary cholangitis; PSC, primary sclerosing cholangitis.

(B) Date of search: 31 March 2020

|                          | Search # | Query                                                                                                                                                                                                                                                                                                                                                                                                                                                                                                                                                                                                                                                                                                                                                                                                                                                                                                                       | Number of citations |
|--------------------------|----------|-----------------------------------------------------------------------------------------------------------------------------------------------------------------------------------------------------------------------------------------------------------------------------------------------------------------------------------------------------------------------------------------------------------------------------------------------------------------------------------------------------------------------------------------------------------------------------------------------------------------------------------------------------------------------------------------------------------------------------------------------------------------------------------------------------------------------------------------------------------------------------------------------------------------------------|---------------------|
| Disease                  | #1       | ("cholestatic pruritus") OR (("pruritus" OR "pruritus" OR itch*) AND (PBC OR "primary biliary cirrhosis" OR "primary biliary cholangitis" OR "cholestatic liver disease" OR "biliary liver cirrhosis" OR cholestasis OR "chronic liver disease" OR PSC OR "primary sclerosing cholangitis"))                                                                                                                                                                                                                                                                                                                                                                                                                                                                                                                                                                                                                                | 4557                |
| Intervention             | #2       | drug OR treatment OR therapy OR cholestyramine OR Colestyramine OR colesevalam OR anti-histamine OR colestipol OR rifampicin OR rifampicin OR naltrexone OR nalmefene OR nalmetrene OR sertraline OR gabapentin OR Phenobarbital OR phenobarbitone OR phenobarb OR Cetirizine OR Cyproheptadine OR Desloratadine OR Diphenhydramine OR Fexofenadine OR Hydroxyzine OR Loratadine OR Nalfurafine OR Buprenorphine OR Naloxone OR Flumecinol OR Ondansetron OR Cimetidine OR Propofol OR Lidocaine OR Maralixibat OR Odevixibat OR Fenofibrate OR Bezafibrate OR "LPA inhibitors" OR "ATX inhibitors" OR Fibrates or colestimide or colestilan OR Elobixibat OR Volixibat OR linerixibat OR antibiotic OR "opiate antagonist" OR "serotonin reuptake inhibitor" OR barbituate OR "benzhydrol derivative" OR "5-HT3 antagonist" OR "H2 antagonist" OR anesthetic OR "bile acid sequestrant" OR antiepileptic OR anti-epileptic | 16,946,819          |
| Filters and Combinations | #3       | #1 AND #2                                                                                                                                                                                                                                                                                                                                                                                                                                                                                                                                                                                                                                                                                                                                                                                                                                                                                                                   | 35789               |
|                          | #4       | #3 NOT (case report OR nonhuman)                                                                                                                                                                                                                                                                                                                                                                                                                                                                                                                                                                                                                                                                                                                                                                                                                                                                                            | 2317                |
|                          | #5       | #4 NOT ('intrahepatic cholestasis'/dm OR 'pregnancy complication'/dm)                                                                                                                                                                                                                                                                                                                                                                                                                                                                                                                                                                                                                                                                                                                                                                                                                                                       | 1842                |
|                          | #6       | #5 NOT ('editorial'/it OR 'letter'/it OR 'review'/it OR 'short survey'/it)                                                                                                                                                                                                                                                                                                                                                                                                                                                                                                                                                                                                                                                                                                                                                                                                                                                  | 1325                |

ATX, autotaxin; EMBASE, Excerpta Medica Database; PBC, primary biliary cholangitis; PSC, primary sclerosing cholangitis

(C) Date of search: 31 March 2020

|                          | Search # | Query                                                                                                                                                                                                                                                                                                                                                                                                                                                                                                                                                                                                                                                                                                                                                                                                                                                                                                                        | Number of citations |
|--------------------------|----------|------------------------------------------------------------------------------------------------------------------------------------------------------------------------------------------------------------------------------------------------------------------------------------------------------------------------------------------------------------------------------------------------------------------------------------------------------------------------------------------------------------------------------------------------------------------------------------------------------------------------------------------------------------------------------------------------------------------------------------------------------------------------------------------------------------------------------------------------------------------------------------------------------------------------------|---------------------|
| Disease                  | #1       | ("Pruritus") AND (("Biliary Liver Cirrhosis") OR ("Intrahepatic Cholestasis"))                                                                                                                                                                                                                                                                                                                                                                                                                                                                                                                                                                                                                                                                                                                                                                                                                                               | 53                  |
|                          | #2       | ("cholestatic pruritus") OR (("pruritus" OR "pruritus" OR itch*) AND (PBC OR "primary biliary cirrhosis" OR "primary biliary cholangitis" OR "cholestatic liver disease" OR "biliary liver cirrhosis" OR cholestasis OR PSC OR "primary sclerosing cholangitis"))                                                                                                                                                                                                                                                                                                                                                                                                                                                                                                                                                                                                                                                            | 387                 |
|                          | #3       | #1 OR #2                                                                                                                                                                                                                                                                                                                                                                                                                                                                                                                                                                                                                                                                                                                                                                                                                                                                                                                     | 387                 |
| Intervention             | #4       | drug OR treatment OR therapy OR cholestyramine OR Colestyramine OR colesevalam OR anti-histamine OR colestipol OR rifampicin OR rifampicin OR naltrexone OR nalmeferone OR nalmefene OR sertraline OR gabapentin OR Phenobarbital OR phenobarbitone OR phenobarb OR Cetirizine OR Cyproheptadine OR Desloratadine OR Diphenhydramine OR Fexofenadine OR Hydroxyzine OR Loratadine OR Nalfurafine OR Buprenorphine OR Naloxone OR Flumecinol OR Ondansetron OR Cimetidine OR Propofol OR Lidocaine OR Maralixibat OR Odevixibat OR Fenofibrate OR Bezafibrate OR "LPA inhibitors" OR "ATX inhibitors" OR Fibrates or colestimide or colestilan OR Elobixibat OR Volixibat OR linerixibat OR antibiotic OR "opiate antagonist" OR "serotonin reuptake inhibitor" OR barbituate OR "benzhydrol derivative" OR "5-HT3 antagonist" OR "H2 antagonist" OR anesthetic OR "bile acid sequestrant" OR antiepileptic OR anti-epileptic | 1,053,665           |
| Filters and Combinations | #5       | #4 AND #5                                                                                                                                                                                                                                                                                                                                                                                                                                                                                                                                                                                                                                                                                                                                                                                                                                                                                                                    | 369                 |

ATX, autotaxin; CENTRAL, Cochrane central register of controlled trials; LPA, lysophosphatidic acid; PBC, primary biliary cholangitis; PSC, primary sclerosing cholangitis.

(D) Date of search: 12 March 2020

|                          | Search # | Query                                                                                                                              | Number of citations |
|--------------------------|----------|------------------------------------------------------------------------------------------------------------------------------------|---------------------|
| Disease                  | #1       | Pruritus                                                                                                                           | 1283                |
|                          | #2       | PBC OR primary biliary cholangitis OR cholestatic liver disease OR biliary liver cirrhosis OR cholestasis OR chronic liver disease | 1280                |
| Filters and Combinations | #3       | #1 AND #2                                                                                                                          | 41                  |

PBC, primary biliary cholangitis; ICTRP, International Clinical Trials Registry Platform; WHO, World Health Organisation.

**Supplementary Table 2.** Inclusion and exclusion criteria for participants, interventions, outcomes and study design.

| Category             | Inclusion criteria                                                                                                                                                                                                                                                                                                                                                                                                                                                                                                                                                                                                                                                                                                                                                                                                                                                                                                                                                                                                      | Exclusion criteria                                                                                                                                                                                                                       |
|----------------------|-------------------------------------------------------------------------------------------------------------------------------------------------------------------------------------------------------------------------------------------------------------------------------------------------------------------------------------------------------------------------------------------------------------------------------------------------------------------------------------------------------------------------------------------------------------------------------------------------------------------------------------------------------------------------------------------------------------------------------------------------------------------------------------------------------------------------------------------------------------------------------------------------------------------------------------------------------------------------------------------------------------------------|------------------------------------------------------------------------------------------------------------------------------------------------------------------------------------------------------------------------------------------|
| <b>Participants</b>  | <ul style="list-style-type: none"> <li>• Adults (≥18 years) with cholestatic pruritus</li> <li>• ≥75% of participants with PBC or PSC</li> </ul>                                                                                                                                                                                                                                                                                                                                                                                                                                                                                                                                                                                                                                                                                                                                                                                                                                                                        | <ul style="list-style-type: none"> <li>• Children/adolescents</li> <li>• Pruritus not related to cholestasis</li> <li>• &gt;25% with non-PBC/PSC liver disease</li> </ul>                                                                |
| <b>Interventions</b> | <ul style="list-style-type: none"> <li>• <b>Bile acid sequestrants:</b> cholestyramine, colesevelam, colestipol, colestimide</li> <li>• <b>Antibiotics:</b> Rifampicin</li> <li>• <b>Opiate antagonists:</b> naltrexone, nalmefene, nalfurafine, buprenorphine, naloxone</li> <li>• <b>Serotonin reuptake inhibitor:</b> sertraline</li> <li>• <b>Antiepileptic:</b> gabapentin</li> <li>• <b>Barbiturate/benzhydryl derivative:</b> phenobarbital, flumecinol</li> <li>• <b>5-HT3 antagonist / H2 antagonist:</b> ondansetron, cimetidine</li> <li>• <b>Antihistamines:</b> cetirizine, cyproheptadine, desloratadine, diphenhydramine, fexofenadine, hydroxyzine, loratadine</li> <li>• <b>Anaesthetics:</b> propofol, lidocaine</li> <li>• <b>IBAT inhibitors:</b> elobixibat, linerixibat, maralixibat, odevixibat, volixibat</li> <li>• <b>Fibrates:</b> Fenofibrate, bezafibrate</li> <li>• <b>ATX and LPA inhibitors</b></li> <li>• <b>Placebo/best supportive care</b></li> </ul>                               | <ul style="list-style-type: none"> <li>• Non-pharmacologic treatment</li> <li>• Treatments targeting the underlying liver disease but not associated pruritus: UDCA, obeticholic acid, cyclosporine, methotrexate, colchicine</li> </ul> |
| <b>Outcomes</b>      | <p><b>Efficacy</b></p> <ul style="list-style-type: none"> <li>• Pruritus measure <ul style="list-style-type: none"> <li>○ Numerical rating scale</li> <li>○ Visual analogue scale</li> <li>○ Adult itch reported outcome</li> <li>○ PBC-40/PBC-27 itch domain</li> <li>○ 5-D itch scale</li> <li>○ Measurements from activity monitoring devices</li> </ul> </li> </ul> <p><b>Safety</b></p> <ul style="list-style-type: none"> <li>• Treatment-emergent adverse events</li> <li>• Treatment related adverse events</li> <li>• Serious adverse events</li> <li>• Specific adverse events</li> <li>• Withdrawals <ul style="list-style-type: none"> <li>○ Due to adverse events</li> <li>○ Due to lack of efficacy</li> </ul> </li> </ul> <p><b>HRQoL and other PROs</b></p> <ul style="list-style-type: none"> <li>• PBC-40/PBC-27</li> <li>• Generic measures (e.g., EQ-5D, SF-36, etc.)</li> <li>• Depression</li> <li>• Satisfaction with study medication</li> <li>• Patient Global Impression of Change</li> </ul> | <ul style="list-style-type: none"> <li>• Relevant outcomes not reported</li> </ul>                                                                                                                                                       |
| <b>Study design</b>  | <p><b>Randomised controlled trials</b></p> <ul style="list-style-type: none"> <li>• Parallel group</li> <li>• Crossover</li> <li>• Cluster</li> </ul> <p><b>Non-randomised studies</b></p> <ul style="list-style-type: none"> <li>• No restrictions on observational studies</li> <li>• No restrictions on design features</li> </ul>                                                                                                                                                                                                                                                                                                                                                                                                                                                                                                                                                                                                                                                                                   | <ul style="list-style-type: none"> <li>• Preclinical studies</li> <li>• Case reports</li> </ul>                                                                                                                                          |

|                               |                                                                                                                                                                                                                      |                                                                                                                                                  |
|-------------------------------|----------------------------------------------------------------------------------------------------------------------------------------------------------------------------------------------------------------------|--------------------------------------------------------------------------------------------------------------------------------------------------|
| <b>Timeframe/setting</b>      | <ul style="list-style-type: none"> <li>• No restrictions on duration of follow-up</li> <li>• No restrictions on geographic setting</li> <li>• No restrictions on clinical setting</li> </ul>                         | N/A                                                                                                                                              |
| <b>Report characteristics</b> | <ul style="list-style-type: none"> <li>• No temporal limit applied in the database searches</li> <li>• No restrictions on publication language</li> <li>• No restrictions on publication format or status</li> </ul> | <ul style="list-style-type: none"> <li>• Reviews</li> <li>• Letters</li> <li>• Comments</li> <li>• Case reports</li> <li>• Editorials</li> </ul> |

ATX, autotaxin; EQ-5D, EuroQol five-dimension scale; HRQoL, health-related quality of life; IBAT, ileal bile acid transporter; LPA, lysophosphatidic acid; N/A, not applicable; PBC, primary biliary cholangitis; PRO, patient-reported outcome; PSC, primary sclerosing cholangitis; SF-36, 36-Item Short Form survey; UDCA, ursodeoxycholic acid.

**Supplementary Table 3.** Key information extracted from relevant studies.

| Data extraction fields                        | Information extracted                                                                                                                                                                                                                                                           |
|-----------------------------------------------|---------------------------------------------------------------------------------------------------------------------------------------------------------------------------------------------------------------------------------------------------------------------------------|
| Study characteristics                         | Name, citation, related publications, objective, geography, single- or multi-centre, date, sponsorship, design, statistical methods, eligibility criteria, interventions, primary and secondary endpoints, duration, conclusions, assumptions, limitations and generalisability |
| Treatment characteristics                     | Treatments, administration, dosage(s) and schedule(s), concomitant treatments, duration, sample size for efficacy and/or safety                                                                                                                                                 |
| Baseline characteristics                      | Number of PBC or PSC patients, PBC or PSC histological stages, gender, age, primary liver diagnosis, baseline laboratory values, PBC treatment, prior and current pruritus treatments, comorbidities, BMI, history of transplant, outcome measurements of interest              |
| Efficacy outcomes                             | NRS, VAS, pruritus severity reduction and/or improvement, adult ItchRO, PBC-40/PBC-27 itch domain, 5-D itch scale, measurements from activity monitoring devices, interference of itch on sleep, measures of fatigue (e.g., FACIT)                                              |
| Safety outcomes                               | AEs, SAEs, treatment-related AEs and any AE specifically monitored, total withdrawals, withdrawals due to AEs, withdrawals due to lack of efficacy                                                                                                                              |
| Health-related quality of life and other PROs | PBC-40/PBC-27, EQ-5D/SF-36, depression, PROs related to patient satisfaction and impression of change                                                                                                                                                                           |

AEs, adverse events; BMI, body mass index; EQ-5D, EuroQol-5D; FACIT, Functional Assessment of Chronic Illness Therapy; NRS, numerical rating scale; PBC, primary biliary cholangitis; PRO, patient-reported outcome; PSC, primary sclerosing cholangitis; SAEs, serious AEs; SF-36, 36-Item Short Form survey; VAS, visual analogue scale.



**Supplementary Table 4. Overview of pruritus efficacy measures and outcomes of included clinical trials**

| Study                              | Assessment                                                                                                                                                                                                                                                                               | Timepoint                    | Interventions and dosage                                | N  | Efficacy findings                                                                                                                                                                                                                                                                                             |
|------------------------------------|------------------------------------------------------------------------------------------------------------------------------------------------------------------------------------------------------------------------------------------------------------------------------------------|------------------------------|---------------------------------------------------------|----|---------------------------------------------------------------------------------------------------------------------------------------------------------------------------------------------------------------------------------------------------------------------------------------------------------------|
| <b>Anion-exchange resins (n=8)</b> |                                                                                                                                                                                                                                                                                          |                              |                                                         |    |                                                                                                                                                                                                                                                                                                               |
| Zuin 1991 [63]                     | Pruritus NRS: severe = 3; moderate = 2; slight = 1; none = 0                                                                                                                                                                                                                             | Baseline, Month 2            | Cholestyramine 8–16 g/day                               | 11 | 0.99 [mean; P<0.01]                                                                                                                                                                                                                                                                                           |
|                                    |                                                                                                                                                                                                                                                                                          | Baseline, Month 2            | DEAE-Dextran 4–6 g/day                                  | 19 | 1.04 [mean; P<0.01]                                                                                                                                                                                                                                                                                           |
|                                    | Disappearance of pruritus: severe = 3, moderate = 2, slight = 1, none = 0                                                                                                                                                                                                                | Month 2                      | Cholestyramine 8–16 g/day                               | 11 | n=5 (45.5%)                                                                                                                                                                                                                                                                                                   |
|                                    |                                                                                                                                                                                                                                                                                          | Month 2                      | DEAE-Dextran 4–6 g/day                                  | 19 | n=7 (36.8%)                                                                                                                                                                                                                                                                                                   |
| Datta 1966 [36]                    | Pruritus severity/intensity reduction/improvement                                                                                                                                                                                                                                        | Month 13.2 (8.2) [mean (SD)] | Cholestyramine 3.3–10g/day                              | 20 | Relieved: n=14<br>Partial relief: n=3<br>No relief: 4                                                                                                                                                                                                                                                         |
| Van Berge Henegouwen 1974 [58]     | Pruritus NRS:<br>- no pruritus;<br>+ sporadic pruritus without scratch effects, only occurring during a warm environment;<br>++ moderate intermittent pruritus with scratch effects on the skin;<br>+++ severe, often intolerable pruritus, present day and night, with scratch effects. | Baseline, Week 5             | Cholestyramine 8–12 g/day                               | 8  | -1.71 (0.49) [mean (SD)]<br><br>PBC patient with pruritus score of +++, only had + after treatment.<br>7 patients with pruritus score of ++ and +++ had no more pruritus. (5 patients with a pruritus score of ++ and 2 patients with + had no more pruritus at all during administration of cholestyramine.) |
|                                    | Pruritus severity/intensity reduction/improvement: 1                                                                                                                                                                                                                                     | Week 5                       |                                                         | 8  | Intensity reduction: n=1<br>No pruritus: n=7                                                                                                                                                                                                                                                                  |
| Taha 1994 [53]                     | Pruritus VAS median (IQR) (0, no pruritus; 100, severe pruritus preventing sleep)                                                                                                                                                                                                        | Baseline, Week 2             | Cholestyramine 4 g BID                                  | 8  | 18.43 (5.84, 40.85) mm                                                                                                                                                                                                                                                                                        |
|                                    |                                                                                                                                                                                                                                                                                          | Baseline, Week 2             | None                                                    | 8  | 33.27 (21.56, 75.08) mm                                                                                                                                                                                                                                                                                       |
|                                    |                                                                                                                                                                                                                                                                                          | Baseline, Week 2             | UDCA 750 mg/day–12 mg/kg/day                            | 8  | 28.97 (14.99, 50.13) mm                                                                                                                                                                                                                                                                                       |
|                                    |                                                                                                                                                                                                                                                                                          | Baseline, Week 2             | Cholestyramine + UDCA 4 g BID + 750 mg/day–12 mg/kg/day | 8  | 27.81 (16.73, 51.86) mm                                                                                                                                                                                                                                                                                       |
| Kuiper 2010 [41]                   | Pruritus severity/intensity reduction/improvement: ≥40% reduction in morning pruritus VAS                                                                                                                                                                                                | Baseline, Day 21             | Colesevelam 1.875 g BID                                 | 17 | 6 (36.0%); Itch intensity 44 mm                                                                                                                                                                                                                                                                               |
|                                    |                                                                                                                                                                                                                                                                                          | Baseline, Day 21             | Placebo                                                 | 18 | 6 (35.0%); Itch intensity 38 mm                                                                                                                                                                                                                                                                               |
| Yokomori 2001 [14]                 | Pruritus NRS: from 1 (no itching) to 10 (severe and constant itching), via self-administered questionnaire containing 6 questions proposed by Ingham [68] and Lowrie et al. [69]                                                                                                         | Week 4                       | UDCA 600 mg/day (8 weeks)                               | 6  | 3.8 (0.4) [mean (SEM); nonsignificant vs baseline]                                                                                                                                                                                                                                                            |
|                                    |                                                                                                                                                                                                                                                                                          | Week 8                       | UDCA 600 mg/day (4 weeks)                               | 5  | 2.5 (0.3) [mean (SEM); nonsignificant vs baseline]                                                                                                                                                                                                                                                            |

|                          |                                                                                                                                                                                                                                                                                                        |                  |                                                |     |                                                                             |
|--------------------------|--------------------------------------------------------------------------------------------------------------------------------------------------------------------------------------------------------------------------------------------------------------------------------------------------------|------------------|------------------------------------------------|-----|-----------------------------------------------------------------------------|
|                          |                                                                                                                                                                                                                                                                                                        | Week 4           | UDCA 600 mg/day-colestilan 6.4 g/day (4 weeks) | 5   | 1.2 (0.2) [mean (SEM); p<0.05 vs baseline]                                  |
| Floeani 1988 [38]        | Pruritus severity/intensity reduction/improvement: assayed by an intensity scale                                                                                                                                                                                                                       | Day 15           | DEAE-Dextran 3000–6000 mg                      | 12  | Complete disappearance: n=5<br>Decrease: n=2<br>No change: n=5              |
|                          |                                                                                                                                                                                                                                                                                                        | Day 15           | Placebo                                        | 12  | No change: n=12                                                             |
| Duncan 1984 [37]         | Pruritus NRS: cumulative scores for the last 10 days of each treatment period (0 = no pruritus, 1 = mild, 2 = moderate, 3 = severe)                                                                                                                                                                    | Baseline, Week 2 | Cholestyramine 4 g BID                         | 8   | 12.88 (8.82) [mean (SD)]; difference from placebo: -7.38 (7.21) [mean (SD)] |
|                          |                                                                                                                                                                                                                                                                                                        | Baseline, Week 2 | Terfenadine 60 mg TID                          | 8   | 15.75 (5.97) [mean (SD)]; difference from placebo: -4.50 (4.31) [mean (SD)] |
|                          |                                                                                                                                                                                                                                                                                                        | Baseline, Week 2 | Chlorpheniramine 4 mg TID                      | 8   | 19.25 (7.36) [mean (SD)]; difference from placebo: -1.00 (5.04) [mean (SD)] |
|                          |                                                                                                                                                                                                                                                                                                        | Baseline, Week 2 | Placebo (lactose) 200 mg TID                   | 8   | 20.25 (5.42) [mean (SD)]                                                    |
| <b>Antibiotics (n=8)</b> |                                                                                                                                                                                                                                                                                                        |                  |                                                |     |                                                                             |
| Bachs 1992 [32]          | Pruritus NRS:<br>3+ = continuous pruritus disturbing sleep pattern;<br>2+ = moderate pruritus present most of the time but tolerable and not interfering with sleep pattern;<br>1+ = mild intermittent pruritus which did not affect the patient's routine or disturb sleep pattern;<br>0 = no itching | Week 2           | Rifampicin 10 mg/kg/day                        | 16  | Week 2: 0.6 (0.1) [mean (SE); degree; P<0.001 vs baseline]                  |
|                          |                                                                                                                                                                                                                                                                                                        | Month 3          |                                                | 14  | Month 3: 0.2 (0.1) [mean (SE); P<0.001 vs baseline]                         |
|                          |                                                                                                                                                                                                                                                                                                        | Month 6          |                                                | 10  | Month 6: 0.4 (0.2) [mean (SE); P<0.001 vs baseline]                         |
|                          |                                                                                                                                                                                                                                                                                                        | Month 9          |                                                | 10  | Month 9: 0.3 (0.1) [mean (SE); P<0.001 vs baseline]                         |
|                          |                                                                                                                                                                                                                                                                                                        | Month 12         |                                                | 10  | Month 12: 0 (0) [mean (SE); P<0.001 vs baseline]                            |
|                          |                                                                                                                                                                                                                                                                                                        | Month 15         |                                                | 9   | Month 15: 0 (0) [mean (SE); P<0.001 vs baseline]                            |
|                          |                                                                                                                                                                                                                                                                                                        | Month 18         |                                                | 4   | Month 18: 0 (0) [mean (SE); P<0.001 vs baseline]                            |
|                          |                                                                                                                                                                                                                                                                                                        | Month 24         |                                                | 2   | Month 24: 0 (0) [mean (SE); P<0.001 vs baseline]                            |
| Loginov 1993 [44]        | Measurements after the 2-week course of treatment. Scale for measure of intensity of pruritus not reported                                                                                                                                                                                             | Week 2           | Rifampicin 450–600 mg/day                      | 7   | Significant decrease: 3<br>Complete resolution: 4                           |
| Webb 2018 [60]           | Patients who reported resolution of pruritus and stopped taking rifampicin                                                                                                                                                                                                                             | n/a              | Rifampicin 150–600 mg/day                      | 105 | 17 (16.2%)<br>9 (8.6%) reported a lack of efficacy despite dose uptitration |

|                                 |                                                                                                                                                                                                                                                                                                        |                                         |                                      |    |                                                                                                                                     |
|---------------------------------|--------------------------------------------------------------------------------------------------------------------------------------------------------------------------------------------------------------------------------------------------------------------------------------------------------|-----------------------------------------|--------------------------------------|----|-------------------------------------------------------------------------------------------------------------------------------------|
| Ghent 1988 [39]                 | Pruritus VAS: consisted of a card with a 100-mm line on which patients marked their itch severity ranging from none (0) to severe (100)                                                                                                                                                                | Baseline, Day 7, Day 14, Week 1, Week 2 | Rifampicin 300–450 mg/day            | 9  | Day 7: 29.2751 (mean)<br>Day 14: 34.6058 (mean)<br>Week 1: 265.7435 (mean)<br>Week 2: 176.5454 (52.4262) [mean (SD)]                |
|                                 |                                                                                                                                                                                                                                                                                                        | Baseline, Day 7, Day 14, Week 1, Week 2 | Placebo                              | 9  | Day 7: 49.4160 (mean)<br>Day 14: 53.4190 (mean)<br>Week 1: 408.5261 (66.2490) [mean (SD)]<br>Week 2: 346.0124 (97.2144) [mean (SD)] |
| Podesta 1991 (RCT) [49]         | Pruritus severity/intensity reduction/improvement: full response (pruritus disappeared) or partial response (50% reduction in pruritus scores)                                                                                                                                                         | Week 1                                  | Rifampicin 300 mg BID                | 14 | Full response: n=11<br>Partial response: n=3                                                                                        |
|                                 |                                                                                                                                                                                                                                                                                                        | Week 1                                  | Placebo                              | 14 | Full response: n=0<br>Partial response: n=2                                                                                         |
|                                 | Change in Pruritus VAS: A scale from 0 to 100 where 100 = pruritus that interfered with sleep, altered daily activities, or resulted in self-inflicted skin breakdown. The pruritus score reported corresponds to the mean of the last 2 days of each period                                           | Baseline, Week 1                        | Rifampicin 300 mg BID                | 14 | -65.93 (23.08) [mean (SD)]                                                                                                          |
|                                 |                                                                                                                                                                                                                                                                                                        | Baseline, Week 1                        | Placebo                              | 14 | 16.43 (33.71) [mean (SD)]                                                                                                           |
| Podesta 1991 (OL) [49]          | Pruritus severity/intensity reduction/improvement: Full response (pruritus disappeared) or partial response (50% reduction in pruritus scores)                                                                                                                                                         | 8.2 (4.2) months [Mean (SD)]            | Rifampicin 300 mg BID                | 18 | Full response: 17<br>Partial response: 1                                                                                            |
| Tabibian 2017 [52]              | 5-D itch scale                                                                                                                                                                                                                                                                                         | Week 12                                 | Rifaximin 1100 mg                    | 13 | 7 (6–8) [median (IQR)]                                                                                                              |
| Bachs 1989 [31]                 | Pruritus NRS:<br>3+ = continuous pruritus disturbing sleep pattern;<br>2+ = moderate pruritus present most of the time but tolerable and not interfering with sleep pattern;<br>1+ = mild intermittent pruritus which did not affect the patient's routine or disturb sleep pattern;<br>0 = no itching | Week 2                                  | Rifampicin 10 mg/kg/day              | 21 | 0.8 (0.9) [mean (SD)]; -1.57 (0.81) [mean (SD); change from baseline/washout]                                                       |
|                                 |                                                                                                                                                                                                                                                                                                        | Week 2                                  | Phenobarbitone 3 mg/kg               | 18 | 1.4 (0.9) [mean (SD)]; -0.33 (0.69) [mean (SD); change from baseline/washout]                                                       |
|                                 | Pruritus severity/intensity reduction/improvement                                                                                                                                                                                                                                                      | Week 2                                  | Rifampicin 10 mg/kg/day              | 21 | Pruritus improved (disappeared): n=19 (n=9)                                                                                         |
|                                 |                                                                                                                                                                                                                                                                                                        | Week 2                                  | Phenobarbitone 3 mg/kg               | 18 | Pruritus improved (disappeared): n=8 (n=0)                                                                                          |
| <b>Oral opiate agents (n=7)</b> |                                                                                                                                                                                                                                                                                                        |                                         |                                      |    |                                                                                                                                     |
| Yagi 2018 [62]                  | Pruritus VAS                                                                                                                                                                                                                                                                                           | Week 12                                 | Nalfurafine hydrochloride 2.5 µg/day | 44 | 29.3 (24.64) [mean (SD)]                                                                                                            |

|                       |                                                                                                                                                                                                                                                                                                                                                                                                                                         |                                 |                                                                   |    |                                                                                                                                                                   |
|-----------------------|-----------------------------------------------------------------------------------------------------------------------------------------------------------------------------------------------------------------------------------------------------------------------------------------------------------------------------------------------------------------------------------------------------------------------------------------|---------------------------------|-------------------------------------------------------------------|----|-------------------------------------------------------------------------------------------------------------------------------------------------------------------|
| Thornton 1988 [55]    | Pruritus VAS: Pruritus was measured daily for 2 weeks before the study and then for 2 weeks at 1, 3, and 6 months; patients scored their pruritus on a VAS consisting of a 10 cm line ranging from "no itching" to "very itchy"                                                                                                                                                                                                         | Month 1                         | Nalmefene 20-40 mg TID                                            | 9  | Month 1: 0.2 (0.0-2.4); 0.5722 (0.8588) [median (range); mean (SD)]                                                                                               |
|                       |                                                                                                                                                                                                                                                                                                                                                                                                                                         | Month 3                         |                                                                   | 9  | Month 3: 0.2 (0.0-2.6); 0.6474 (0.8247) [median (range); mean (SD)]                                                                                               |
|                       |                                                                                                                                                                                                                                                                                                                                                                                                                                         | Month 6                         |                                                                   | 8  | Month 6: 0.3 (0.0-1.8); 0.4257 (0.6077) [median (range); mean (SD)]                                                                                               |
| Bergasa 1992 [33]     | VAS: Mean (SD) change in mean VAS (%) relative to placebo number of centimetres (to the nearest millimetre) between 0 cm (i.e., no itching) and the point on the scale at which the patient made a mark; maximum is 10 cm (i.e., worst itching ever). Measured by scratching activity monitoring system designed specifically for this purpose; in units of counts per unit time                                                        | Baseline, 24 hours per infusion | Naloxone 0.2 µg/kg/min (total volume infused per 24 hours = 0.5L) | 8  | 19.38% (68.53)<br>Measured by scratching activity monitoring system designed specifically for this purpose; in units of counts per unit time                      |
| Summerfield 1980 [51] | Change in Pruritus VAS: this was a 10 cm horizontal line on a white card marked at the left end 'none' and at the right end 'unbearable'. The patient assessed the previous night's itching by marking a point along this line. The VAS were later estimated to within 1 mm. Patients could not refer to earlier assessments. The results were expressed as the change in itch score between the treatment night and the previous night | Baseline, Night 4               | Naloxone 2 mg QD via IV for 5 months                              | 20 | -0.95 [mean; paired t-test vs PBO t=0.152]                                                                                                                        |
|                       |                                                                                                                                                                                                                                                                                                                                                                                                                                         | Baseline, Night 4               | Placebo                                                           | 20 | 1.33 [mean]                                                                                                                                                       |
| Terg 2002 (RCT) [54]  | Pruritus VAS: Scale of 0 (absence of pruritus) to 10 (pruritus interfered with sleep, altered daily activities or resulted in self-inflicted skin breakdown); daytime pruritus was assessed before retiring to sleep while night-time pruritus was assessed at wake-up                                                                                                                                                                  | Baseline, Week 2                | Naltrexone-Placebo 50 mg/day                                      | 11 | Daytime pruritus: 3.91 (2.39) [at the end of naltrexone treatment; mean (SD)]<br>Night-time pruritus: 3.89 (2.17) [at the end of naltrexone treatment; mean (SD)] |
|                       |                                                                                                                                                                                                                                                                                                                                                                                                                                         | Baseline, Week 4                | Placebo-Naltrexone 50 mg/day                                      | 9  | Daytime pruritus: 3.06 (2.47) [at the end of naltrexone treatment; mean (SD)]<br>Night-time pruritus: 3.05 (2.77) [at the end of naltrexone treatment; mean (SD)] |
|                       |                                                                                                                                                                                                                                                                                                                                                                                                                                         | Baseline, 2 weeks               | Naltrexone 50 mg/day                                              | 18 | Daytime pruritus: 3.55 (2.39) [at the end of naltrexone treatment; mean (SD)]<br>Night-time pruritus: 3.55 (2.42) [at the end of naltrexone treatment; mean (SD)] |
|                       |                                                                                                                                                                                                                                                                                                                                                                                                                                         | Baseline, 2 weeks               | Placebo                                                           | 18 | Daytime pruritus: 5.34 (2.41) [at the end of placebo treatment; mean (SD)]<br>Night-time pruritus: 5.19 (2.55) [at the end of placebo treatment; mean (SD)]       |
| Terg 2002 (OL) [54]   | Ongoing response to treatment following RCT                                                                                                                                                                                                                                                                                                                                                                                             |                                 | Naltrexone 50 mg/day                                              | 7  | Sustained response: 5                                                                                                                                             |

|                                                      |                                                                                                                                                                                                                                                                  |                    |                                               |    |                                                                                                                                                                           |
|------------------------------------------------------|------------------------------------------------------------------------------------------------------------------------------------------------------------------------------------------------------------------------------------------------------------------|--------------------|-----------------------------------------------|----|---------------------------------------------------------------------------------------------------------------------------------------------------------------------------|
|                                                      |                                                                                                                                                                                                                                                                  |                    |                                               |    | Exacerbation of pruritus: 2                                                                                                                                               |
| Wolfhagen 1997 [61]                                  | Change in Pruritus VAS: the VAS scale consisted of 100-mm horizontal line without marks. The left side (0 mm) was labelled "no itching" and the right side (100 mm) was labelled "unbearable itching"                                                            | Baseline, Week 4   | Naltrexone 50 mg/day                          | 7  | Daytime: -37.3992 (6.6136) [mean (SE)]<br>% Change: -58.39% (9.47%) [mean (SEM)]<br>Night-time: -29.9804 (10.6726) [mean (SE)]<br>% Change: -44.58% (12.81%) [mean (SEM)] |
|                                                      |                                                                                                                                                                                                                                                                  | Baseline, Week 4   | Placebo                                       | 8  | Daytime: 3.1033 (4.2705) [mean (SE)]<br>% Change: 8.1% (10.4%) [mean (SEM)]<br>Night-time: 0.3433 (4.1284) [mean (SE)]<br>% Change: 7.6% (9.4%) [mean (SEM)]              |
| <b>Selective Serotonin Reuptake Inhibitors (n=2)</b> |                                                                                                                                                                                                                                                                  |                    |                                               |    |                                                                                                                                                                           |
| Mayo 2007 [45]                                       | Pruritus severity/intensity reduction/improvement: at least 20% reduction in pruritus from baseline                                                                                                                                                              | Week 6             | Sertraline (variable dosing)                  | 12 | n=8                                                                                                                                                                       |
|                                                      |                                                                                                                                                                                                                                                                  | Week 6             | Placebo                                       | 12 | n=0                                                                                                                                                                       |
|                                                      | Change in Pruritus VAS from baseline: measure in a daily itch diary where a continuous scale of exactly 100mm in length from 0 (no pruritus) to 10 (the worst pruritus imaginable) with points anchored and with facial expressions to guide patient's selection | Baseline, Week 6   | Sertraline (variable dosing)                  | 12 | Reported mean change: -1.86                                                                                                                                               |
|                                                      |                                                                                                                                                                                                                                                                  | Baseline, Week 6   | Placebo                                       | 12 | Reported mean change: 0.38                                                                                                                                                |
| Ataei 2019 [30]                                      | Pruritus VAS: 0–10 (at 4 weeks)                                                                                                                                                                                                                                  | Baseline, Week 4   | Sertraline 100 mg                             | 18 | 3.33 (1.68) [mean (SD)]                                                                                                                                                   |
|                                                      |                                                                                                                                                                                                                                                                  | Baseline, Week 4   | Rifampicin 300 mg                             | 18 | 3.44 (2.749) [mean (SD)]                                                                                                                                                  |
| <b>Fibrates (n=6)</b>                                |                                                                                                                                                                                                                                                                  |                    |                                               |    |                                                                                                                                                                           |
| Kanda 2003 [40]                                      | NR                                                                                                                                                                                                                                                               |                    | Bezafibrate + UDCA 400 mg/day–600 mg/day      | NR | NR                                                                                                                                                                        |
|                                                      |                                                                                                                                                                                                                                                                  |                    | UDCA 600 mg/day                               |    |                                                                                                                                                                           |
| Reig 2018 [50]                                       | Pruritus severity/intensity reduction/improvement: 38 months (median)                                                                                                                                                                                            | 38 months (median) | Bezafibrate and continue UDCA 400 mg          | 26 | No change: 1<br>Party disappeared: n=7<br>Completely disappeared: n=16                                                                                                    |
|                                                      |                                                                                                                                                                                                                                                                  |                    | None (discontinued bezafibrate) continue UDCA | NR | NR                                                                                                                                                                        |
|                                                      | Pruritus VAS: Median (IQR) Presence and severity of pruritus was assessed before treatment and at the end of the observation period using the VAS from 0–10)                                                                                                     | Month 38 (median)  | Bezafibrate and continue UDCA 400 mg          | 26 | 0 (0, 1.4)                                                                                                                                                                |
|                                                      |                                                                                                                                                                                                                                                                  | Baseline, Month 3  | None (discontinued bezafibrate) continue UDCA | 11 | 4.6 (3.7, 6.5)                                                                                                                                                            |
| Corpechot 2018 [35]                                  |                                                                                                                                                                                                                                                                  | Month 3            | Bezafibrate 400 mg                            | 49 | Month 3: 0.0566 (0 - 2.9525) [median (IQR)]                                                                                                                               |

|                              |                                                                                                                                                                                     |                        |                                    |                                                   |                                                         |
|------------------------------|-------------------------------------------------------------------------------------------------------------------------------------------------------------------------------------|------------------------|------------------------------------|---------------------------------------------------|---------------------------------------------------------|
|                              | Pruritus VAS: itch intensity score (0–10 VAS, with 0 indicating no itch and 10 indicating the worst itch imaginable)                                                                | Month 12               |                                    | 47                                                | Month 12: 0.0792 (0 - 1.9570) [median (IQR)]            |
| Month 24                     |                                                                                                                                                                                     |                        | 47                                 | Month 24: 0.0566 (0 - 1.4706) [median (IQR)]      |                                                         |
| Month 3                      |                                                                                                                                                                                     | Placebo                | 46                                 | Month 3: 2.7376 (0.2036 - 5.9502) [median (IQR)]  |                                                         |
| Month 12                     |                                                                                                                                                                                     |                        | 44                                 | Month 12: 2.3869 (0.0226 - 5.9502) [median (IQR)] |                                                         |
| Month 24                     |                                                                                                                                                                                     |                        | 40                                 | Month 24: 2.3303 (0.9955 - 4.9434) [median (IQR)] |                                                         |
| de Vries 2019 [64]           | Pruritus severity/intensity reduction/improvement: ≥50% reduction in pruritus (VAS)                                                                                                 | Week 3                 | Bezafibrate 400 mg                 | 37                                                | n=14 (38.0%)                                            |
|                              |                                                                                                                                                                                     | Week 3                 | Placebo                            | 33                                                | n=4 (12.0%)                                             |
| Levy 2011 [7]                | Pruritus severity/intensity reduction/improvement: 0 = absent; 1 = mild; 2 = moderate; and 3 = severe                                                                               | Week 48                | Fenofibrate 160 mg                 | 20                                                | Stable: 44.0%<br>Improved: 28.0%<br>Deteriorated: 28.0% |
| Lemoinne 2018 [42]           | Pruritus severity/intensity reduction/improvement: Intensity of pruritus was defined on a semi-quantitative scale: grade 0, none; grade 1, mild; grade 2, moderate; grade 3, severe | 1.56 years (0.56-5.12) | Fibrate 200 mg/day or 400 mg/day   | 8                                                 | Improved: n=7                                           |
| <b>IBAT Inhibitors (n=3)</b> |                                                                                                                                                                                     |                        |                                    |                                                   |                                                         |
| Hegade 2017 [20]             | Pruritus NRS: Itch Intensity. Absolute score difference vs placebo [LS mean (SE)]                                                                                                   | Week 2                 | Linerixibat 90 mg BID              | 21                                                | LS mean (SE): 1.58 (0.450)                              |
|                              |                                                                                                                                                                                     | Week 2                 | Linerixibat 90 mg BID – Sequence 1 | 11                                                | LS mean (SE); 95% CI: 2.66 (0.733; 1.17, 4.15)          |
|                              |                                                                                                                                                                                     | Week 2                 | Linerixibat 90 mg BID – Sequence 2 | 10                                                | LS mean (SE); 95% CI: 1.58 (0.755; 0.05, 3.11)          |
|                              |                                                                                                                                                                                     | Week 2                 | Placebo – Sequence 1               | 11                                                | LS mean (SE); 95% CI: 2.80 (0.733; 1.31, 4.29)          |
|                              |                                                                                                                                                                                     | Week 2                 | Placebo – Sequence 2               | 10                                                | LS mean (SE); 95% CI: 4.60 (0.755; 3.07, 6.13)          |
|                              | PBC-40/PBC-27 itch domain                                                                                                                                                           | Week 2                 | Linerixibat 90 mg BID              | 21                                                | LS mean (SE): -0.59 (0.176)                             |
|                              |                                                                                                                                                                                     | Week 2                 | Linerixibat 90 mg BID – Sequence 1 | 11                                                | LS mean (SE); 95% CI: 2.73 (0.343); 2.03, 3.43          |
|                              |                                                                                                                                                                                     | Week 2                 | Linerixibat 90 mg BID – Sequence 2 | 10                                                | LS mean (SE); 95% CI: 1.99 (0.349); 1.28, 2.70)         |
|                              |                                                                                                                                                                                     | Week 2                 | Placebo – Sequence 1               | 11                                                | LS mean (SE); 95% CI: 2.61 (0.343); 1.90, 3.31)         |

|                |  |        |                                    |    |                                                                                                                                                                                                                                                                                                                                                                                                                                           |
|----------------|--|--------|------------------------------------|----|-------------------------------------------------------------------------------------------------------------------------------------------------------------------------------------------------------------------------------------------------------------------------------------------------------------------------------------------------------------------------------------------------------------------------------------------|
|                |  | Week 2 | Placebo – Sequence 2               | 10 | LS mean (SE); 95% CI: 3.29 (0.349); 2.58, 4.00)                                                                                                                                                                                                                                                                                                                                                                                           |
| 5-D itch scale |  | Week 2 | Linerixibat 90 mg BID              | 21 | Degree (1-5) [LS mean (SE)]: [-0.65 (0.207)]<br>Direction (1-5) [LS mean (SE)]: [-0.92 (0.298)]<br>Disability (1-5) [LS mean (SE)]: [-1.03 (0.294)]<br>Distribution (1-5) [LS mean (SE)]: [-1.03 (0.247)]<br>Duration (1-5) [LS mean (SE)]: [-0.92 (0.293)]<br>Domain (5-25) [LS mean (SE)]: [-4.55 (1.030)]                                                                                                                              |
|                |  | Week 2 | Linerixibat 90 mg BID – Sequence 1 | 11 | Degree (1-5) [LS mean (SE); 95% CI]: [2.45 (0.276); 1.90, 3.01]<br>Direction (1-5) [LS mean (SE); 95% CI]: [2.64 (0.311); 2.02, 3.25]<br>Disability (1-5) [LS mean (SE); 95% CI]: [3.36 (0.360); 2.64, 4.08]<br>Distribution (1-5) [LS mean (SE); 95% CI]: [3.00 (0.413); 2.16, 3.84]<br>Duration (1-5) [LS mean (SE); 95% CI]: [1.55 (0.421); 0.70, 2.39]<br>Overall domain (5-25) [LS mean (SE); 95% CI]: [13.00 (1.342); 10.31, 15.69] |
|                |  | Week 2 | Linerixibat 90 mg BID – Sequence 2 | 10 | Degree (1-5) [LS mean (SE); 95% CI]: [1.96 (0.285); 1.39, 2.53]<br>Direction (1-5) [LS mean (SE); 95% CI]: [2.18 (0.326); 1.53, 2.83]<br>Disability (1-5) [LS mean (SE); 95% CI]: [2.29 (0.374); 1.54, 3.04]<br>Distribution (1-5) [LS mean (SE); 95% CI]: [2.47 (0.422); 1.61, 3.32]<br>Duration (1-5) [LS mean (SE); 95% CI]: [1.22 (0.433); 0.35, 2.09]<br>Overall domain (5-25) [LS mean (SE); 95% CI]: [10.13 (1.388); 7.35, 12.91]  |
|                |  | Week 2 | Placebo – Sequence 1               | 11 | Degree (1-5) [LS mean (SE); 95% CI]: [2.55 (0.276); 1.99, 3.10]                                                                                                                                                                                                                                                                                                                                                                           |

|                |               |            |                      |    |                                                                                                                                                                                                                                                                                                                                                                                                                                                                      |
|----------------|---------------|------------|----------------------|----|----------------------------------------------------------------------------------------------------------------------------------------------------------------------------------------------------------------------------------------------------------------------------------------------------------------------------------------------------------------------------------------------------------------------------------------------------------------------|
|                |               |            |                      |    | <p>Direction (1-5) [LS mean (SE); 95% CI]: [3.27 (0.311); 2.65, 3.89]</p> <p>Disability (1-5) [LS mean (SE); 95% CI]: [3.73 (0.360); 3.01, 4.45]</p> <p>Distribution (1-5) [LS mean (SE); 95% CI]: [3.45 (0.413); 2.62, 4.29]</p> <p>Duration (1-5) [LS mean (SE); 95% CI]: [2.09 (0.421); 1.24, 2.94]</p> <p>Overall domain (5-25) [LS mean (SE); 95% CI]: [15.09 (1.342); 12.40, 17.78]</p>                                                                        |
|                |               | Week 2     | Placebo – Sequence 2 | 10 | <p>Degree (1-5) [LS mean (SE); 95% CI]: [3.16 (0.285); 2.59, 3.73]</p> <p>Direction (1-5) [LS mean (SE); 95% CI]: [3.38 (0.326); 2.73, 4.03]</p> <p>Disability (1-5) [LS mean (SE); 95% CI]: [3.99 (0.374); 3.24, 4.74]</p> <p>Distribution (1-5) [LS mean (SE); 95% CI]: [4.07 (0.422); 3.21, 4.92]</p> <p>Duration (1-5) [LS mean (SE); 95% CI]: [2.52 (0.433); 1.65, 3.39]</p> <p>Overall domain (5-25) [LS mean (SE); 95% CI]: [17.13 (1.388); 14.35, 19.91]</p> |
| Mayo 2019 [47] | Adult Itch RO | Week 13/ET | Maralixibat 10 mg    | 21 | <p>Week 13/ET Absolute value [mean (SD)]: 6.7 ± 2.92</p> <p>Week 13/ET LS mean change from baseline (95% CI): -4.0 (-5.3, -2.8)</p> <p>Week 13/ET LS mean difference from placebo (95% CI): -0.3 (-2.0, 1.5)</p>                                                                                                                                                                                                                                                     |
|                |               | Week 13/ET | Maralixibat 20 mg    | 21 | <p>Week 13/ET Absolute value [mean (SD)]: 24.4 ± 19.93</p> <p>Week 13/ET LS mean change from baseline (95% CI): -27.3 (-34.8, -19.8)</p> <p>Week 13/ET LS mean difference from placebo (95% CI): -4.0 (-14.2, 6.2)</p> <p>n: 21</p>                                                                                                                                                                                                                                  |
|                |               | Week 13/ET | Placebo              | 23 | <p>Week 13/ET Absolute value [mean (SD)]: 27.5 ± 19.69</p> <p>Week 13/ET LS mean change from baseline (95% CI): -23.4 (-30.3, -16.4)</p> <p>n: 24</p>                                                                                                                                                                                                                                                                                                                |



|                       |                                                                                                                                                                                 |                  |                                                                                            |    |                                                                                                                                                                                                             |
|-----------------------|---------------------------------------------------------------------------------------------------------------------------------------------------------------------------------|------------------|--------------------------------------------------------------------------------------------|----|-------------------------------------------------------------------------------------------------------------------------------------------------------------------------------------------------------------|
|                       | PBC-40/PBC-27                                                                                                                                                                   | Week 13/ET       | Maralixibat 10 mg                                                                          | 21 | Week 13/ET Absolute value [mean (SD)]:<br>6.7 ± 2.92                                                                                                                                                        |
|                       |                                                                                                                                                                                 | Week 13/ET       | Maralixibat 20 mg                                                                          | 21 | Week 13/ET Absolute value [mean (SD)]:<br>6.3 ± 2.88                                                                                                                                                        |
|                       |                                                                                                                                                                                 | Week 13/ET       | Placebo                                                                                    | 23 | Week 13/ET Absolute value [mean (SD)]:<br>7.2 ± 3.76                                                                                                                                                        |
|                       | 5-D itch scale                                                                                                                                                                  | Week 13/ET       | Maralixibat 10 mg                                                                          | 21 | Week 13/ET Absolute value [mean (SD)]:<br>12.1 ± 3.97<br>Week 13/ET LS mean change from<br>baseline (95% CI): -6.9 (-8.9, -4.8)<br>Week 13/ET LS mean difference from<br>placebo (95% CI): -0.5 (-3.4, 2.3) |
|                       |                                                                                                                                                                                 | Week 13/ET       | Maralixibat 20 mg                                                                          | 21 | Week 13/ET Absolute value [mean (SD)]:<br>12.4 ± 4.69<br>Week 13/ET LS mean change from<br>baseline (95% CI): -6.7 (-8.8, -4.6)<br>Week 13/ET LS mean difference from<br>placebo (95% CI): -0.4 (-3.2, 2.5) |
|                       |                                                                                                                                                                                 | Week 13/ET       | Placebo                                                                                    | 23 | Week 13/ET Absolute value [mean (SD)]:<br>12.7 ± 5.63<br>Week 13/ET LS mean change from<br>baseline (95% CI): -6.3 (-8.3, -4.4)                                                                             |
| Al-Dury 2018 [18]     | PBC-40/PBC-27 itch domain                                                                                                                                                       | 4 weeks          | Selective IBAT inhibitor<br>(A4250/odevixibat) 0.75<br>mg/day or 1.5 mg/day or 3<br>mg/day | 4  | Overall domain score: 4.50 (2.38) [mean<br>(SD)]                                                                                                                                                            |
|                       |                                                                                                                                                                                 | 4 weeks          | Cholestyramine or<br>Colestipol                                                            | 4  | Overall domain score: 10.50 (3.32) [mean<br>(SD)]                                                                                                                                                           |
| <b>Other (n=8)</b>    |                                                                                                                                                                                 |                  |                                                                                            |    |                                                                                                                                                                                                             |
| Turner 1990 [56]      | Pruritus VAS: 100 mm VAS (0=no itch, 100= severe,<br>continuous day and night intolerable itch) - last 7<br>days                                                                | Baseline, Week 3 | Flumecinol 600 mg                                                                          | 21 | 30.7 [mean; pruritus level fell significantly<br>compared with placebo (p=0.017;<br>ANOVA)]                                                                                                                 |
|                       |                                                                                                                                                                                 | Baseline, Week 3 | Placebo                                                                                    | 20 | 37.3 [mean]                                                                                                                                                                                                 |
| Turner 1994 (LD) [57] | Change in Pruritus VAS: For each patient, mean<br>VAS scores (itching and quality of life) for<br>consecutive 7-day periods of observation were<br>computed as summary measures | Baseline, Week 3 | Flumecinol 600 mg                                                                          | 24 | -9.4 (-29, -2) [Median (IQR)]<br>median difference vs PBO: -8.0 (-20.8, 2.1)<br>[median (95% CI)]                                                                                                           |
|                       |                                                                                                                                                                                 | Baseline, Week 3 | Placebo                                                                                    | 26 | -4.2 (-13, 6) [Median (IQR)]                                                                                                                                                                                |
| Turner 1994 (HD) [57] | Change in Pruritus VAS: For each patient, mean<br>VAS scores (itching and quality of life) for                                                                                  | Baseline, Week 3 | Flumecinol 300 mg                                                                          | 10 | -21.7 (-28, -12) [Median (IQR)]<br>median difference vs PBO: -19.8 (-40.7,<br>-3.3) [median (95% CI)]                                                                                                       |

|                         |                                                                                                                                                                                                                                                                                                                                                                                                                                                                 |                    |                                                             |    |                                                                                                                                                                        |
|-------------------------|-----------------------------------------------------------------------------------------------------------------------------------------------------------------------------------------------------------------------------------------------------------------------------------------------------------------------------------------------------------------------------------------------------------------------------------------------------------------|--------------------|-------------------------------------------------------------|----|------------------------------------------------------------------------------------------------------------------------------------------------------------------------|
|                         | consecutive 7-day periods of observation were computed as summary measures                                                                                                                                                                                                                                                                                                                                                                                      | Baseline, Week 3   | Placebo                                                     | 9  | -21.7 (-28, -12) [Median (IQR)]                                                                                                                                        |
| Villamil 2005 [59]      | Pruritus VAS: used average over 7 days using "The mean of the values of the daily visual analogue scale scores for the 7 days of the study were analyzed"<br>Patients were asked to record the severity of their pruritus on a VAS at baseline and every 12 hours (before going to bed and after awakening) for the following 7 days. Scales were designed according to standard principles and consisted of 100-mm horizontal lines without intermediate marks | 7 days             | Lidocaine 100 mg IV over 5 minutes                          | 11 | 50.5 (25.4) [mean (SD)]                                                                                                                                                |
|                         |                                                                                                                                                                                                                                                                                                                                                                                                                                                                 | 7 days             | Placebo                                                     | 5  | 71.7 (8.9) [mean (SD)]                                                                                                                                                 |
| Mayo 2018 [46]          | Pruritus VAS: VAS: visual analogue scale; Improved: decrease of 20% or greater from baseline value; Worsened: increase of 20% or greater from baseline value                                                                                                                                                                                                                                                                                                    | Baseline, Day 28   | NGM282 3 mg SC                                              | 7  | Improved: 3<br>No change: 2<br>Worsened: 0<br>Missing/not reported: 2<br>Change in VAS score: 12.6 (24.9) [mean (SD)]<br>-4.5 (-13.2, 4.3) [LSM (95% CI)]; vs placebo] |
|                         |                                                                                                                                                                                                                                                                                                                                                                                                                                                                 | Baseline, Day 28   | Placebo                                                     | 10 | Improved: 3<br>No change: 5<br>Worsened: 1<br>Missing/not reported: 1                                                                                                  |
| Mayo 2019 (NGM282) [47] | NRS (ranging from 0–10) at week 12                                                                                                                                                                                                                                                                                                                                                                                                                              | Week 12            | NGM282 1 mg                                                 | 21 | Change from baseline: 0.01 [LS mean] difference vs placebo: -0.47 (-1.93–0.99) [mean (95% CI)]                                                                         |
|                         |                                                                                                                                                                                                                                                                                                                                                                                                                                                                 | Week 12            | NGM282 3 mg                                                 | 21 | Change from baseline: -0.32 [LS mean] difference vs placebo: -0.52 (-1.96–0.92) [mean (95% CI)]                                                                        |
|                         |                                                                                                                                                                                                                                                                                                                                                                                                                                                                 | Week 12            | Placebo                                                     | 20 | Change from baseline: 0.36 [LS mean]                                                                                                                                   |
| Bloomer 1975 [34]       | Pruritus NRS: 0 = None, 1 = mild, 2 = moderate, 3 = Marked. Average duration of Pruritus therapy (months) = 2.86 (1.41) [mean (SD)]                                                                                                                                                                                                                                                                                                                             | 2.86 (1.41) months | Phenobarbital 120 mg/day–250 mg/day                         | 9  | 0.67 (0.5) [mean (SD)]<br>Change from baseline: -1.11 (0.78) [mean (SD)]                                                                                               |
| O'Donohue 2005 [48]     | Pruritus severity/intensity reduction/improvement: >50% reduction in the severity of pruritus (VAS) vs Day 0                                                                                                                                                                                                                                                                                                                                                    | Day 1, Day 5       | Ondansetron 8 mg BID; IV injection (Day 1) + oral (Day 1–5) | 9  | n=2 (Day1)<br>n=1 (5-day treatment period)                                                                                                                             |
|                         |                                                                                                                                                                                                                                                                                                                                                                                                                                                                 | Day 1, Day 5       | Placebo (saline)                                            | 10 | n=1 (Day1)<br>n=2 (5-day treatment period)                                                                                                                             |

|  |                                                                                |                        |                                                             |    |                                                                                                       |
|--|--------------------------------------------------------------------------------|------------------------|-------------------------------------------------------------|----|-------------------------------------------------------------------------------------------------------|
|  | Change in Pruritus VAS: 0 = no pruritus and 10 = the worst imaginable pruritus | Baseline, Day 1, Day 5 | Ondansetron 8 mg BID; IV injection (Day 1) + oral (Day 1–5) | 9  | 17.0% (mean reduction Day 1 vs Day 0)<br>21.0% (mean reduction over 5-day treatment period vs Day 0); |
|  |                                                                                | Baseline, Day 1, Day 5 | Placebo (saline)                                            | 10 | 17.0% (mean reduction Day 1 vs Day 0)<br>22.0% (mean reduction over 5-day treatment period vs Day 0)  |

ANOVA, analysis of variance; BID, twice daily; CI, confidence interval; DEAE, diethylaminoethyl; ET, early termination; IBAT, ileal bile acid transporter; IQR, interquartile range; IV, intravenous; LS, least squares; n/a, not available; NR, not reported; NRS, numerical rating scale; OL, open label; PBC, primary biliary cholangitis; PBO, placebo; QD, once daily; RCT, randomised controlled trial; SD, standard deviation; SE, standard error; SEM, standard error of the mean; TID, three times daily; UDCA, ursodeoxycholic acid; VAS, visual analogue scale.

**Supplementary Table 5.** Overview of safety data from included clinical trials.

| Study                              | Interventions                                                                                              | N  | Treatment-related AEs | Treatment-related SAEs | Withdrawals due to AEs | AEs occurring in ≥5% of patients, n (%)                                       |
|------------------------------------|------------------------------------------------------------------------------------------------------------|----|-----------------------|------------------------|------------------------|-------------------------------------------------------------------------------|
| <b>Anion-exchange resins (n=8)</b> |                                                                                                            |    |                       |                        |                        |                                                                               |
| Datta 1966 [36]                    | Cholestyramine 3.3–10.0 g/day                                                                              | 17 | NR                    | NR                     | NR                     | NR                                                                            |
| Van Berge Henegouwen 1974 [58]     | Cholestyramine 8–12 g/day                                                                                  | NR | NR                    | NR                     | 0                      | NR                                                                            |
| Duncan 1984 [37]                   | Cholestyramine 4 g BID                                                                                     | 8  | NR                    | NR                     | 2                      | Diarrhoea, n=4 (50.0)<br>Vomiting, n=2 (25.0)                                 |
|                                    | Terfenadine 60 mg TID                                                                                      | 8  | NR                    | NR                     | 0                      | Emotional lability (rapid changes in mood), n=1 (12.5)                        |
|                                    | Chlorpheniramine 4 mg TID                                                                                  | 8  | NR                    | NR                     | 0                      | Drowsiness, n=2 (25.0)<br>Headache, n=1 (12.5)                                |
|                                    | Placebo (lactose) 200 mg TID                                                                               | 8  | NR                    | NR                     | 1                      | Nausea, n=1 (12.5)<br>Cutaneous burning, n=1 (12.5)                           |
| Floreani 1988 [38]                 | DEAE-dextran 3000–6000 mg vs placebo                                                                       | NR | NR                    | NR                     | NR                     | NR                                                                            |
| Zuin 1991 [63]                     | Cholestyramine 8–16 g/day                                                                                  | 15 | NR                    | NR                     | NR                     | Diarrhoea, n=6 (40.0)<br>Constipation, n=1 (6.7)<br>Abdominal pain, n=1 (6.7) |
|                                    | DEAE-Dextran 4–6 g/day                                                                                     | 19 | NR                    | NR                     | NR                     | Diarrhoea, n=3 (15.8)<br>Abdominal pain, n=2 (10.5)                           |
| Taha 1994 [53]                     | Cholestyramine 4 g BID vs no treatment vs UDCA vs cholestyramine 4 g BID + UDCA<br>750 mg/day–12 mg/kg/day | 8  | NR                    | NR                     | NR                     | NR                                                                            |
| Yokomori 2001 [14]                 | UDCA 600 mg/day (8 weeks)                                                                                  | 6  | 0                     | 0                      | NR                     | NR                                                                            |
|                                    | UDCA 600 mg/day (4 weeks)                                                                                  | 5  | 0                     | 0                      | NR                     | NR                                                                            |
|                                    | UDCA-colestilan (4 weeks)                                                                                  | 5  | 0                     | 0                      | NR                     | NR                                                                            |
| Kuiper 2010 [41]                   | Colesevelam 1.875 g BID vs placebo                                                                         | NR | NR                    | NR                     | NR                     | NR                                                                            |

| <b>Antibiotics (n=8)</b>        |                                                                   |     |    |    |    |                                                                                                                                                                                                                                       |
|---------------------------------|-------------------------------------------------------------------|-----|----|----|----|---------------------------------------------------------------------------------------------------------------------------------------------------------------------------------------------------------------------------------------|
| Ghent 1988 [39]                 | Rifampicin 300-450 mg/day                                         | 9   | 0  | 0  | 0  | NR                                                                                                                                                                                                                                    |
|                                 | Placebo                                                           | 9   | 0  | 0  | 0  | NR                                                                                                                                                                                                                                    |
| Bachs 1989 [31]                 | Rifampicin 10 mg/kg                                               | 22  | 1  | NR | 1  | NR ≥5%                                                                                                                                                                                                                                |
|                                 | Phenobarbitone 3 mg/kg                                            | 21  | 3  | NR | 3  | Rash, 3 (14.3)                                                                                                                                                                                                                        |
| Podesta 1991 (RCT) [49]         | Rifampicin                                                        | 14  | 0  | 0  | 0  | NR                                                                                                                                                                                                                                    |
|                                 | Placebo                                                           | 14  | 0  | 0  | 0  | NR                                                                                                                                                                                                                                    |
| Podesta 1991 (OL) [49]          | Rifampicin                                                        | 18  | NR | NR | NR | NR                                                                                                                                                                                                                                    |
| Bachs 1992 [32]                 | Rifampicin 10 mg/kg/day                                           | 16  | NR | NR | 6  | Liver transplantation, n=3 (18.8)<br>Toxic hepatitis, n=2 (12.5)<br>Peripheral oedema, n=1 (6.3)                                                                                                                                      |
| Loginov 1993 [44]               | Rifampicin 450–600 mg                                             | 7   | NR | NR | 1  | Upper abdominal pain, n=2 (28.6)<br>Nausea, n=1 (14.3)<br>Drop in leukocyte level, n=1 (14.3)                                                                                                                                         |
| Tabibian 2017 [52]              | Rifaximin 1100 mg                                                 | 16  | NR | NR | 3  | Headache, n=2 (12.5)<br>Dyspepsia, n=2 (12.5)<br>Dizziness, n=1 (6.3)<br>Rapid increase in liver enzymes, n=1 (6.3)<br>Endoscopic retrograde cholangiography: n=1 (6.3)                                                               |
| Webb 2018 [60]                  | Rifampicin 150–600 mg/day                                         | 105 | NR | NR | 19 | Liver transplantation, n=21 (20.0)<br>Hepatitis, n=5 (4.8)                                                                                                                                                                            |
| <b>Oral opiate agents (n=8)</b> |                                                                   |     |    |    |    |                                                                                                                                                                                                                                       |
| Summerfield 1980 [51]           | Naloxone: 2 mg QD via IV for 5 months vs placebo                  | NR  | NR | NR | NR | NR                                                                                                                                                                                                                                    |
| Thornton 1988 [55]              | Nalmefene 20–40 mg TID                                            | 9   | NR | NR | 1  | Severe opioid withdrawal, n=9 (100)<br>Bilirubin increase, n=1 (11.1)<br>Deepening jaundice, n=1 (11.1)                                                                                                                               |
| Bergasa 1992 [33]               | Naloxone 0.2 µg/kg/min (total volume infused per 24 hours = 0.5L) | 8   | 0  | 0  | NR | NR                                                                                                                                                                                                                                    |
|                                 | Placebo (5% dextrose/0.45% NaCl)                                  | 8   | 0  | 0  | NR | NR                                                                                                                                                                                                                                    |
| Wolfhagen 1997 [61]             | Naltrexone                                                        | 8   | NR | NR | 0  | Abdominal cramps, n=5 (62.5)<br>Opioid withdrawal, n=4 (50.0)<br>Nausea, n=4 (50.0)<br>Dizziness, n=3 (37.5)<br>Drowsiness, n=2 (37.5)<br>Dry mouth, n=2 (25.0)<br>Flushing, n=2 (25.0)<br>Headache, n=1 (12.5)<br>Tremor, n=1 (12.5) |

|                                                      |                                                                                                                                     |    |    |    |    |                                                                                                                                                                                                                                                                                                                                                                                     |
|------------------------------------------------------|-------------------------------------------------------------------------------------------------------------------------------------|----|----|----|----|-------------------------------------------------------------------------------------------------------------------------------------------------------------------------------------------------------------------------------------------------------------------------------------------------------------------------------------------------------------------------------------|
|                                                      |                                                                                                                                     |    |    |    |    | Peripheral oedema, n=1 (12.5)<br>Nightmares, n=1 (12.5)<br>Night sweating, n=1 (12.5)                                                                                                                                                                                                                                                                                               |
|                                                      | Placebo                                                                                                                             | 8  | NR | NR | 0  | Abdominal cramps, n=1 (12.5)<br>Dry mouth, n=1 (12.5)<br>Night sweating, n=1 (12.5)<br>Epistaxis, n=1 (12.5)<br>Swelling of the hands, n=1 (12.5)                                                                                                                                                                                                                                   |
| Terg 2002 (RCT) [54]                                 | Naltrexone 50 mg/day                                                                                                                | 20 | NR | NR | 2  | Dizziness, n=10 (50.0)<br>Nausea, n=8 (40.0)<br>Vomiting, n=6 (30.0)<br>Abdominal cramps, n=5 (25.0)<br>Headache, n=5 (25.0)<br>Asthenia, n=3 (15.0)<br>Drowsiness, n=3 (15.0)<br>Irritability, n=3 (15.0)<br>Dry mouth, n=3 (15.0)<br>Insomnia, n=2 (10.0)<br>Tremor, n=1 (5.0)<br>Tachycardia, n=1 (5.0)<br>Anorexia, n=1 (5.0)<br>Flushing, n=1 (5.0)<br>Hypertension, n=1 (5.0) |
|                                                      | Placebo                                                                                                                             | 20 | NR | NR | 0  | Headache, n=3 (15.0)<br>Vomiting, n=2 (10.0)<br>Drowsiness, n=2 (10.0)<br>Irritability, n=2 (10.0)<br>Abdominal cramps, n=1 (5.0)<br>Nausea, n=1 (5.0)                                                                                                                                                                                                                              |
| Terg 2002 (OL) [54]                                  | Naltrexone 50 mg/day                                                                                                                | 7  | NR | NR | NR | NR                                                                                                                                                                                                                                                                                                                                                                                  |
| Yagi 2018 [62]                                       | Nalfurafine hydrochloride 2.5 µg/day                                                                                                | NR | NR | NR | NR | NR                                                                                                                                                                                                                                                                                                                                                                                  |
| <b>Selective serotonin reuptake inhibitors (n=2)</b> |                                                                                                                                     |    |    |    |    |                                                                                                                                                                                                                                                                                                                                                                                     |
| Mayo 2007 [45]                                       | Sertraline (variable dosing) initial dose of 25 mg QD, increased in 25 mg increments at 4-week intervals to a maximum of 100 mg QD. | 21 | NR | NR | 1  | Insomnia, n=3 (14.3)<br>Fatigue, n=2 (9.5)<br>Liver transplantation, n=2 (9.5)<br>Increased bowel frequency, n=2 (9.5)<br>Visual hallucinations, n=2 (9.5)<br>Nausea, n=1 (4.8)<br>Dizziness, n=1 (4.8)                                                                                                                                                                             |
|                                                      | Placebo                                                                                                                             | 12 | NR | NR | 1  | Insomnia, n=6 (50)                                                                                                                                                                                                                                                                                                                                                                  |

|                      |                                                             |    |    |    |    |                                                                                                                                                                                                                                                                                                                                                                     |
|----------------------|-------------------------------------------------------------|----|----|----|----|---------------------------------------------------------------------------------------------------------------------------------------------------------------------------------------------------------------------------------------------------------------------------------------------------------------------------------------------------------------------|
|                      |                                                             |    |    |    |    | Fatigue, n=2 (16.7)<br>Nausea, n=1 (8.3)                                                                                                                                                                                                                                                                                                                            |
| Ataei 2019 [30]      | Sertraline 100 mg                                           | 18 | NR | NR | 0  | Nausea, n=3 (16.7)                                                                                                                                                                                                                                                                                                                                                  |
|                      | Rifampicin 300 mg                                           | 18 | NR | NR | 0  | Nausea, n=1 (5.6)                                                                                                                                                                                                                                                                                                                                                   |
| <b>Fibrate (n=6)</b> |                                                             |    |    |    |    |                                                                                                                                                                                                                                                                                                                                                                     |
| Kanda 2003 [40]      | Bezafibrate 400 mg/day +<br>UDCA 600 mg/day                 | 11 | NR | 0  | 0  | Polydipsia, n=1 (9.1)                                                                                                                                                                                                                                                                                                                                               |
|                      | UDCA 600 mg/day                                             | 11 | NR | 0  | 0  | NR                                                                                                                                                                                                                                                                                                                                                                  |
| Levy 2011 [43]       | Fenofibrate 160 mg                                          | 20 | NR | NR | 2  | Heartburn, n=5 (25.0)<br>Nausea, n=3 (15.0)<br>Diarrhoea, n=2 (10.0)<br>Elevated ALT and AST, n=2 (10.0)<br>Fatigue, n=1 (5.0)<br>Dishydrotic eczema, n=1 (5.0)<br>Renal insufficiency, n=1 (5.0)<br>Arthralgia, n=1 (5.0)<br>Weight gain, n=1 (5.0)<br>Increased appetite, n=1 (5.0)<br>Hot flushes, n=1 (5.0)<br>Rigours, n=1 (5.0)<br>Nasopharyngitis, n=1 (5.0) |
| Reig 2018 [50]       | Bezafibrate 400 mg/day and continue<br>UDCA 13–16 mg/kg/day | 48 | NR | 0  | NR | NR                                                                                                                                                                                                                                                                                                                                                                  |
| Corpechot 2018 [35]  | Bezafibrate 400 mg QD for 24<br>months                      | 50 | NR | NR | 1  | Myalgia, n=10 (20.0)<br>Nasopharyngitis, n=9 (18.0)<br>Abdominal pain, n=7 (14.0)<br>Arthralgia, n=7 (14.0)<br>Depressive mood, n=7 (14.0)<br>Flu-like syndrome, n=5 (10.0)<br>Bronchitis, n=4 (8.0)<br>Pruritus, n=4 (8.0)                                                                                                                                         |
|                      | Placebo                                                     | 50 | NR | NR | 2  | Arthralgia, n=11 (22.0)<br>Nasopharyngitis, n=10 (20.0)<br>Bronchitis, n=9 (13.0)<br>Depressive mood, n=8 (16.0)<br>Pruritus, n=7 (14.0)<br>Diarrhoea, n=6 (12.0)<br>Abdominal pain, n=6 (12.0)<br>Myalgia, n=5 (10.0)<br>Flu-like syndrome, n=5 (10.0)                                                                                                             |

|                             |                                                  |    |           |         |                                                                                                 |                                                                                                                                                                                                                                                                                |
|-----------------------------|--------------------------------------------------|----|-----------|---------|-------------------------------------------------------------------------------------------------|--------------------------------------------------------------------------------------------------------------------------------------------------------------------------------------------------------------------------------------------------------------------------------|
| Lemoine 2018 [42]           | Fibrate 200 mg/day or 400 mg/day                 | 20 | NR        | NR      | 10                                                                                              | Carcinoma (gall bladder), n=1 (5.0)                                                                                                                                                                                                                                            |
| de Vries 2019 [64]          | Bezafibrate 400 mg vs placebo                    | NR | NR        | NR      | NR                                                                                              | NR                                                                                                                                                                                                                                                                             |
| <b>IBAT inhibitor (n=3)</b> |                                                  |    |           |         |                                                                                                 |                                                                                                                                                                                                                                                                                |
| Hegade 2017 [20]            | Linerixibat 90 mg BID                            | 21 | NR        | 0       | 0                                                                                               | Diarrhoea, n=7 (33.0)<br>Headache, n=6 (29.0)<br>Upper abdominal pain, n=3 (14.0)<br>Abdominal distension, n=3 (14.0)<br>Abdominal pain, n=3 (14.0)<br>Nausea, n=2 (10.0)<br>Nasopharyngitis, n=2 (10.0)<br>Fatigue, n=2 (10.0)<br>Vomiting, n=1 (5.0)<br>Dizziness, n=1 (5.0) |
|                             | Placebo                                          | 21 | NR        | 0       | 0                                                                                               | Headache, n=7 (33.0)<br>Vomiting, n=2 (10.0)<br>Dizziness, n=2 (10.0)<br>Paraesthesia/dysaesthesia, n=2 (10)<br>Diarrhoea, n=1 (5.0)<br>Upper abdominal pain, n=1 (5.0)<br>Abdominal distension, n=1 (5.0)                                                                     |
| Al-Dury 2018 [18]           | Odevixibat 0.75 mg/day or 1.5 mg/day or 3 mg/day | 10 | NR        | NR      | 5 [abdominal pain (5/5), diarrhoea (4/5), melena and significantly decreased haemoglobin (1/5)] | NR                                                                                                                                                                                                                                                                             |
| Mayo 2019 [21]              | Maralixibat 10 mg                                | 20 | 15 (75.0) | 1 (5.0) | 1 (5.0)                                                                                         | Diarrhoea, n=14 (70.0)<br>Nausea, n=5 (25.0)<br>Upper abdominal pain, n=4 (20.0)<br>Abdominal pain, n=4 (20.0)<br>Abdominal distension, n=3 (15.0)<br>Fatigue, n=3 (15.0)<br>Headache, n=3 (15.0)                                                                              |
|                             | Maralixibat 20 mg                                | 21 | 15 (71.4) | 0       | 0                                                                                               | Diarrhoea, n=11 (52.4)<br>Upper abdominal pain, n=6 (28.6)<br>Abdominal pain, n=5 (23.8)<br>Nausea, n=4 (19.0)<br>Headache, n= 2 (9.5)                                                                                                                                         |
|                             | Placebo                                          | 24 | 11 (45.8) | 0       | 0                                                                                               | Headache, n=8 (33.3)                                                                                                                                                                                                                                                           |



|                       |                                    |    |           |    |    |                                                                                                                                                                                                                                                                                                                                                                                                                |
|-----------------------|------------------------------------|----|-----------|----|----|----------------------------------------------------------------------------------------------------------------------------------------------------------------------------------------------------------------------------------------------------------------------------------------------------------------------------------------------------------------------------------------------------------------|
|                       |                                    |    |           |    |    | Diarrhoea, n=6 (25.0)<br>Upper abdominal pain, n=2 (8.3)<br>Abdominal distension, n=3 (12.5)<br>Nausea, n=4 (16.7)<br>Pruritus, n=3 (12.5)                                                                                                                                                                                                                                                                     |
| <b>Other (n=8)</b>    |                                    |    |           |    |    |                                                                                                                                                                                                                                                                                                                                                                                                                |
| Bloomer 1975 [34]     | Phenobarbital 120–250 mg/day       | 9  | NR        | NR | 1  | Drowsiness, 9 (100)<br>Gastrointestinal bleeding, n=2 (22.2)<br>Rash, 1 (11.1)                                                                                                                                                                                                                                                                                                                                 |
| Turner 1990 [56]      | Flumecinol 600 mg vs placebo       | NR | NR        | NR | NR | NR                                                                                                                                                                                                                                                                                                                                                                                                             |
| Turner 1994 (LD) [57] | Flumecinol 600 mg                  | 24 | NR        | NR | 0  | NR                                                                                                                                                                                                                                                                                                                                                                                                             |
|                       | Placebo                            | 26 | NR        | NR | 0  | NR                                                                                                                                                                                                                                                                                                                                                                                                             |
| Turner 1994 (HD) [57] | Flumecinol 300 mg                  | 10 | NR        | NR | 0  | NR                                                                                                                                                                                                                                                                                                                                                                                                             |
|                       | Placebo                            | 9  | NR        | NR | 0  | NR                                                                                                                                                                                                                                                                                                                                                                                                             |
| Villamil 2005 [59]    | Lidocaine 100 mg IV over 5 minutes | 12 | NR        | NR | NR | Tinnitus (mild), n=5 (41.7)<br>Paraesthesia/dysaesthesia (lingual), n=2 (16.7)                                                                                                                                                                                                                                                                                                                                 |
|                       | Placebo IV over 5 minutes          | 6  | NR        | NR | NR | NR                                                                                                                                                                                                                                                                                                                                                                                                             |
| O'Donohue 2005 [48]   | Ondansetron 8 mg BID               | 9  | NR        | NR | 0  | Constipation, n=4 (44.4)                                                                                                                                                                                                                                                                                                                                                                                       |
|                       | Placebo (saline)                   | 10 | NR        | NR | 0  | Nausea, n=3 (30.0)<br>Headache, n=2 (20.0)<br>Bilirubin increase, n=1 (10.0)                                                                                                                                                                                                                                                                                                                                   |
| Mayo 2018 [46]        | NGM282 0.3 mg SC                   | 14 | 3 (21.4)  | 0  | 0  | Diarrhoea, n=3 (21.4)<br>Nausea, n=2 (14.3)<br>Headache, n=2 (14.3)<br>Mouth ulceration, n=2 (14.3)<br>Dry eye, n=2 (14.3)<br>Upper respiratory tract infection, n=2 (14.3)<br>Injection-site bruising/erythema, 1 (7.1)                                                                                                                                                                                       |
|                       | NGM282 3 mg SC                     | 16 | 11 (68.8) | 0  | 1  | Diarrhoea, n=4 (25.0)<br>Headache, n=4 (25.0)<br>Increased appetite, n=4 (25.0)<br>Abdominal pain, n=2 (12.5)<br>Nausea, n=2 (12.5)<br>Fatigue, n=2 (12.5)<br>Injection-site bruising/erythema, n=2 (12.5)<br>Loose stools/faecal urgency, n=2 (12.5)<br>Faces discoloured/pale, n=2 (12.5)<br>Vitamin D deficiency, n=2 (12.5)<br>Mouth ulceration, n=1 (6.3)<br>Upper respiratory tract infection, n=1 (6.3) |

|                             |                |    |          |    |    |                                                                                                                                                                                                                                                               |
|-----------------------------|----------------|----|----------|----|----|---------------------------------------------------------------------------------------------------------------------------------------------------------------------------------------------------------------------------------------------------------------|
|                             | Placebo SC     | 15 | 7 (46.7) | 0  | 1  | Abdominal pain, n=4 (26.7)<br>Injection-site bruising/erythema, n=3 (20.0)<br>Upper respiratory tract infection, n=3 (20.0)<br>Diarrhoea, n=1 (6.7)<br>Nausea, n=1 (6.7)<br>Fatigue, n=1 (6.7)<br>Headache, n=1 (6.7)<br>Loose stools/faecal urgency, 1 (6.7) |
| Mayo 2019 (NGM 282)<br>[47] | NGM282 1 mg SC | 21 | NR       | NR | NR | Pruritus, n=1, (5.0)                                                                                                                                                                                                                                          |
|                             | NGM282 3 mg SC | 21 | NR       | NR | NR | Pruritus, n=1, (5.0)                                                                                                                                                                                                                                          |
|                             | Placebo SC     | 20 | NR       | NR | NR | Pruritus, n=2, (10.0)                                                                                                                                                                                                                                         |

AEs, adverse events; ALT, alanine aminotransferase; AST, aspartate transferase; BID, twice daily; DEAE, diethylaminoethyl; HD, high dose; IV, intravenous; LD, low dose; NaCl, sodium chloride; NR, not reported; OL, open label; QD, once daily; RCT, randomised controlled trial; QD, once daily; SAEs, serious AEs; SC, subcutaneous; TID, three-times daily; UDCA, ursodeoxycholic acid.
